# Supplementary material for: Profiling selected paths with loops
Source: Springer Nature journal article supplement (doi:10.1007/s11432-014-5109-5), 2014-06-10
Supplement: 11432_2014_5109_MOESM1_ESM.pdf [file 11432_2014_5109_MOESM1_ESM.pdf]

中文题目：一种有环路径的选择性剖析方法

关键词：路径剖析，兴趣路径，动态分析

创新点：PSP是一种新的路径剖析技术，该技术不仅能够自定义进行有环路径和无环路径选择，还可以通过对非兴趣路径的提前结束来提高执行效率。主要创新点有：（1）将SPP改进为ESPP，以达到无环图上的精确选择性剖析；（2）提出了使用提前结束的方法提高选择性剖析效率的思想；（3）由于提前结束需要在执行中检测非兴趣路径，给出了3种检测的方法T1~T3，具有不同的耗费和收益，以适用不同情况；（4）基于这3种检测方法，设计了4种能够剖析循环的选择性剖析方法PSP0~PSP3，提高了效率。
